# Supplementary material
Source: bioRxiv or medRxiv preprint supplement (https://www.biorxiv.org/highwire/filestream/35388/field_highwire_adjunct_files/10/120170-5.pdf)

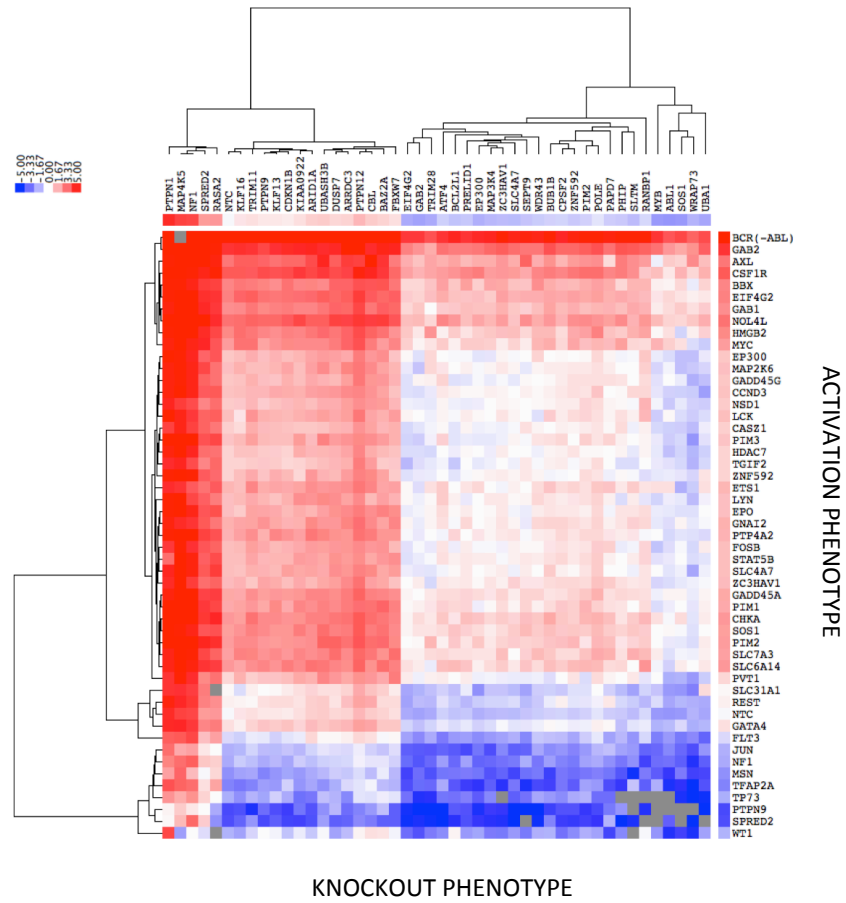

Supplement: Supplementary file [file 120170-5.pdf]
